# Supplementary material for: Vaccine-boosted CAR T crosstalk with host immunity to reject tumors with antigen heterogeneity
Source: PubMed Central journal article supplement (PMC10372881; doi:10.1016/j.cell.2023.06.002), 2023-07-05

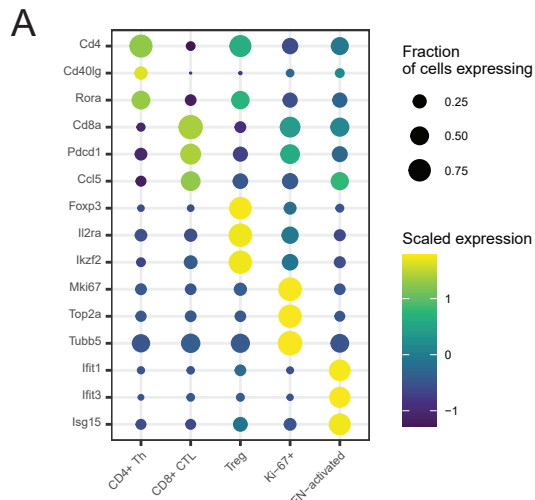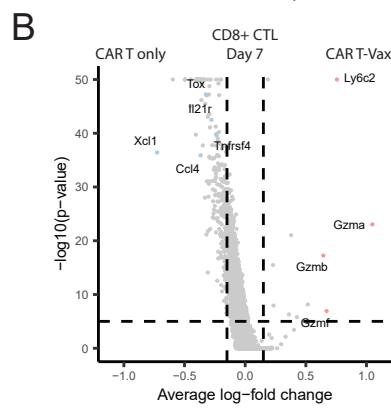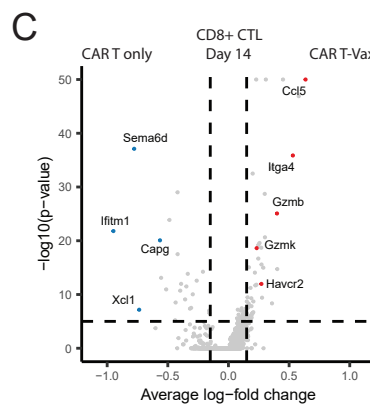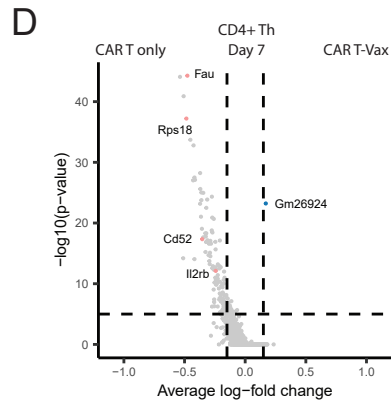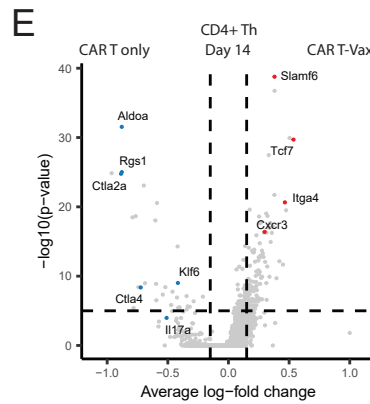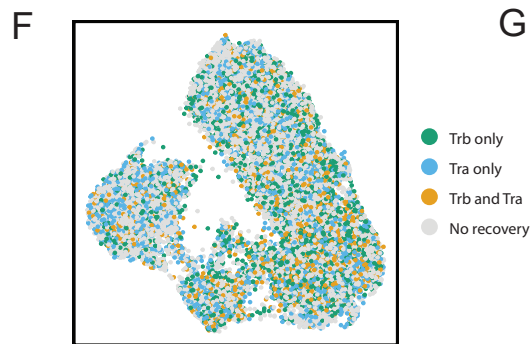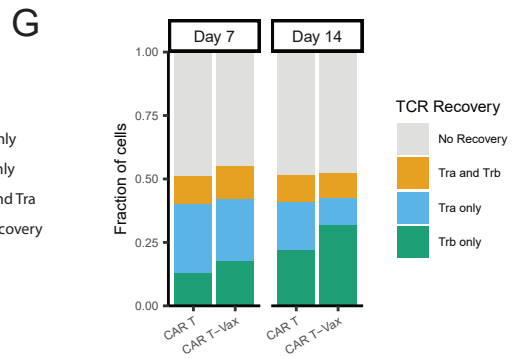

Supplement: NIHMS1908849-supplement-1.pdf [file NIHMS1908849-supplement-1.pdf]
