# Supplementary material for: Vaccine-boosted CAR T crosstalk with host immunity to reject tumors with antigen heterogeneity
Source: PubMed Central journal article supplement (PMC10372881; doi:10.1016/j.cell.2023.06.002), 2023-07-05

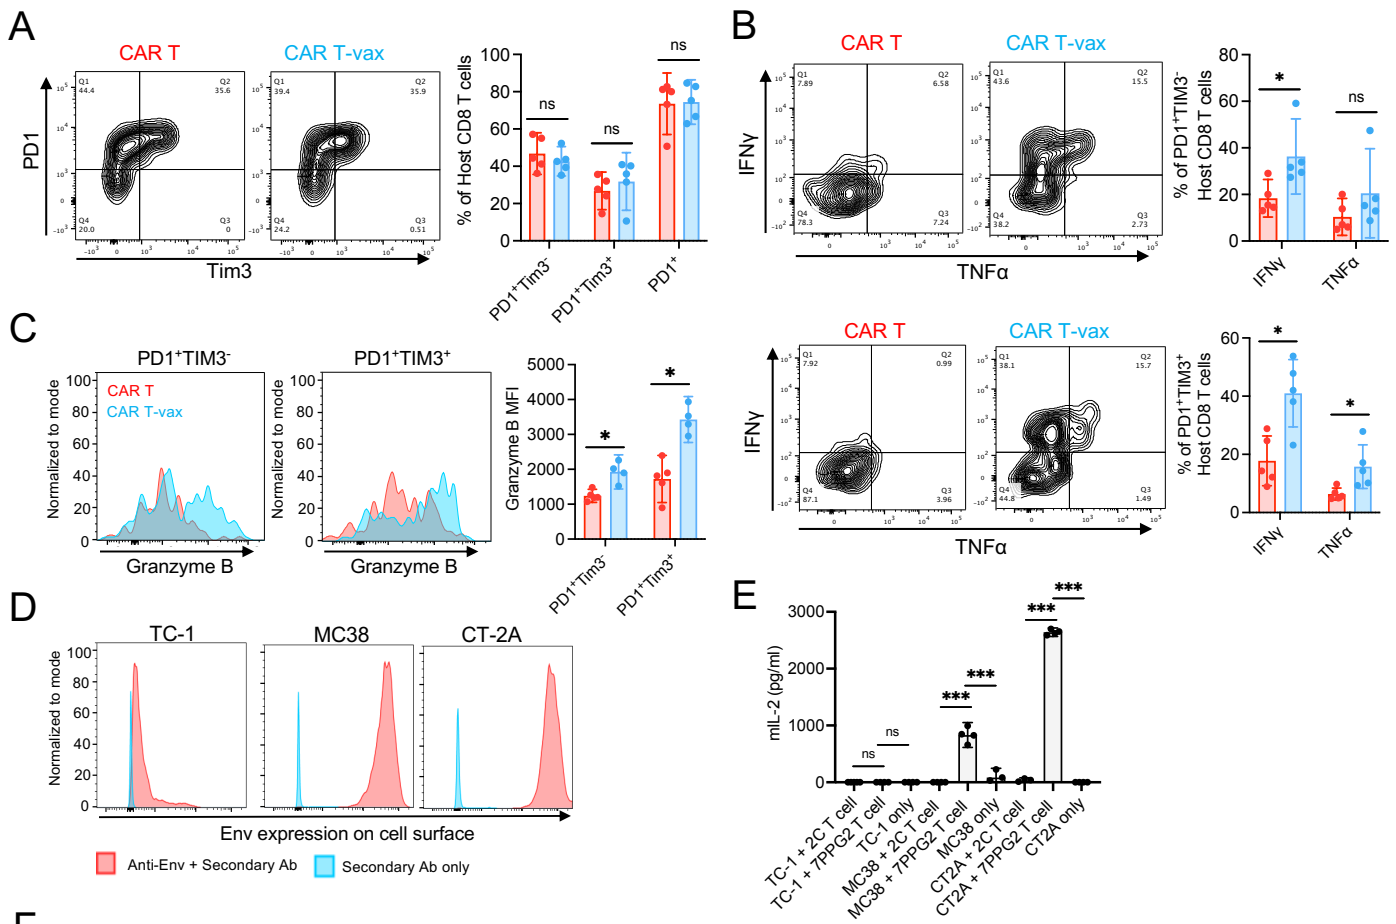

**F**

| Clone Name | Clone size | TRAV      | CDR3 $\alpha$  | TRAJ   | TRBV     | CDR3 $\beta$       | TRBJ    |
|------------|------------|-----------|----------------|--------|----------|--------------------|---------|
| 7PEQ27     | 66         | TRAV7-2   | CAASDYSNNRLT   | TRAJ7  | TRBV16   | CASSLELGGPEQYF     | TRBJ2-7 |
| 7LEQ27     | 52         | TRAV3D-3  | CAVTPDYSNNRLT  | TRAJ7  | TRBV16   | CASSLELGGLEQYF     | TRBJ2-7 |
| 7QTG27     | 42         | TRAV8D-2  | CATDYSNNRLT    | TRAJ7  | TRBV12-1 | CASSQTGGPSYEQYF    | TRBJ2-7 |
| 7LEV24     | 41         | TRAV6-6   | CALLPADYSNNRLT | TRAJ7  | TRBV16   | CASSLEVGGGYSQNTLYF | TRBJ2-4 |
| 7REQ27     | 31         | TRAV7-2   | CAGSPDYSNNRLT  | TRAJ7  | TRBV16   | CASSLELGGREQYF     | TRBJ2-7 |
| 27LEG27    | 27         | TRAV6-4   | CALANTNTGKLTG  | TRAJ27 | TRBV16   | CASSLELGGLEQYF     | TRBJ2-7 |
| 7LRG15     | 15         | TRAV13D-1 | CALGDYSNNRLT   | TRAJ7  | TRBV3    | CASSLRGGDQAPLF     | TRBJ1-5 |
| 7QEG11     | 14         | TRAV5D-4  | CAAKDYSNNRLT   | TRAJ7  | TRBV2    | CASSQEGANTEVFF     | TRBJ1-1 |
| 7QTG25     | 13         | TRAV9N-3  | CAVFPDYSNNRLT  | TRAJ7  | TRBV2    | CASSQTGGGDTQYI     | TRBJ2-5 |
| N7LEQ27    | 11         | TRAV7-2   | CAANDYSNNRLT   | TRAJ7  | TRBV16   | CASSLELGGLEQYF     | TRBJ2-7 |

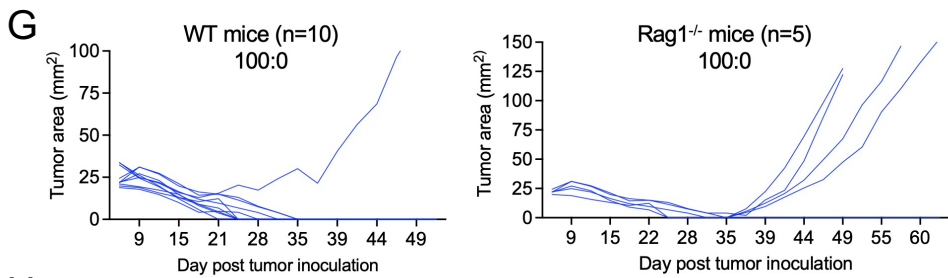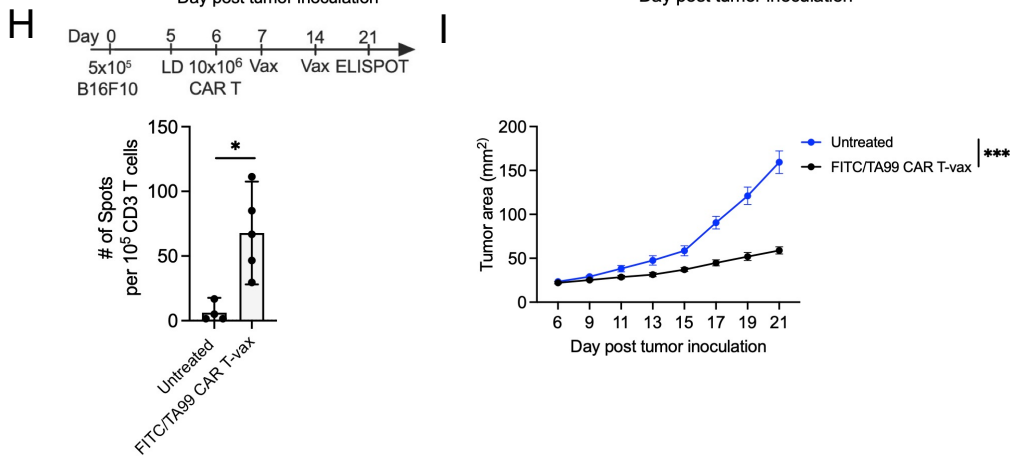

Supplement: NIHMS1908849-supplement-6.pdf [file NIHMS1908849-supplement-6.pdf]
